# Supplementary material for: Metagenomic Insights into the Anti-Obesity Effect of a Polysaccharide from Saccharina japonica
Source: MDPI journal article supplement (doi:10.3390/foods12030665), 2023-02-03
Supplement: s1 [file s1]

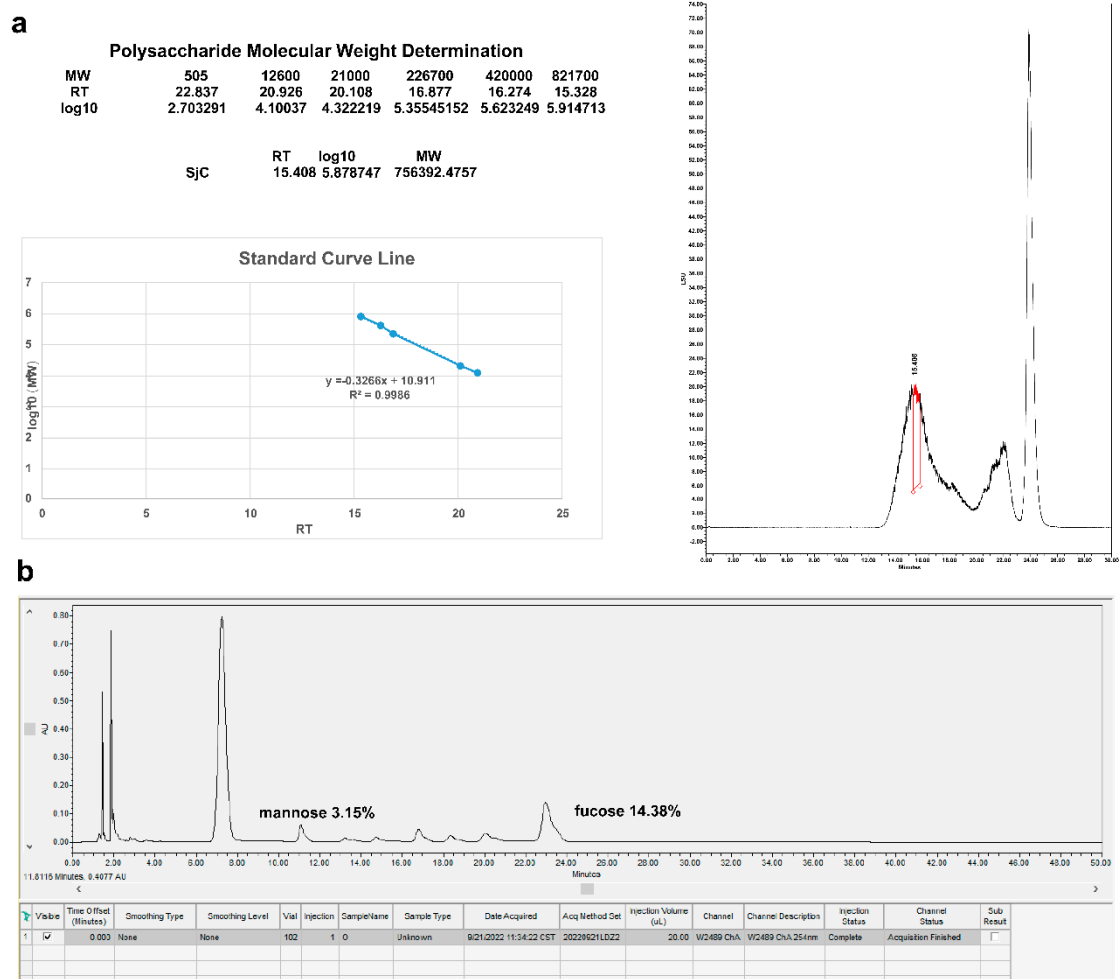

**Figure S1. (a) Molecular Weight Dtermination. (b) HPLC analysis for SjC.**

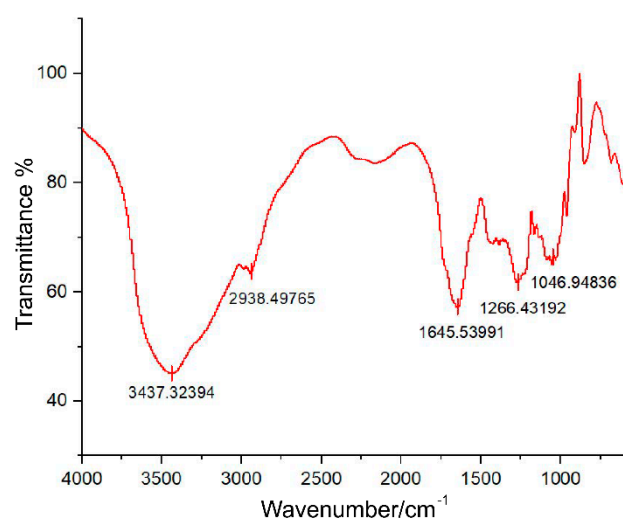

**Figure S2. The IR spectrometer of SjC.**

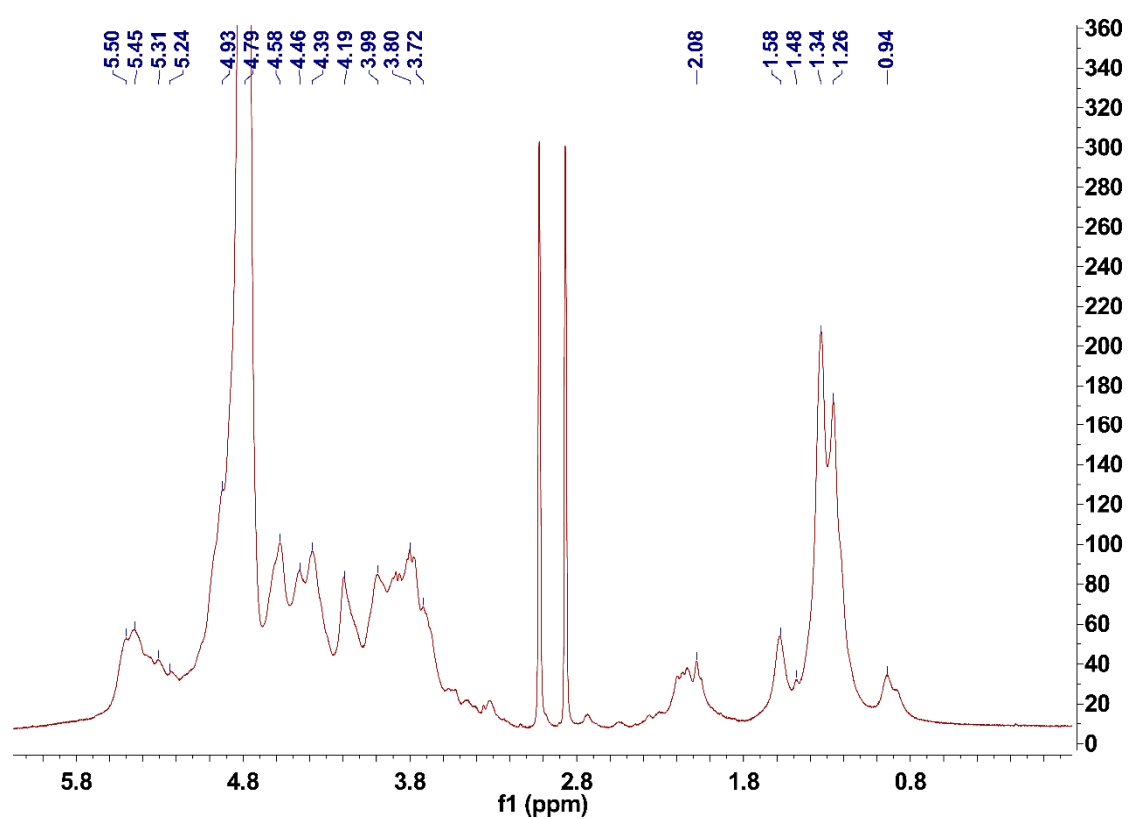

Figure S3.  $^1\text{H}$ -NMR spectra of SjC.

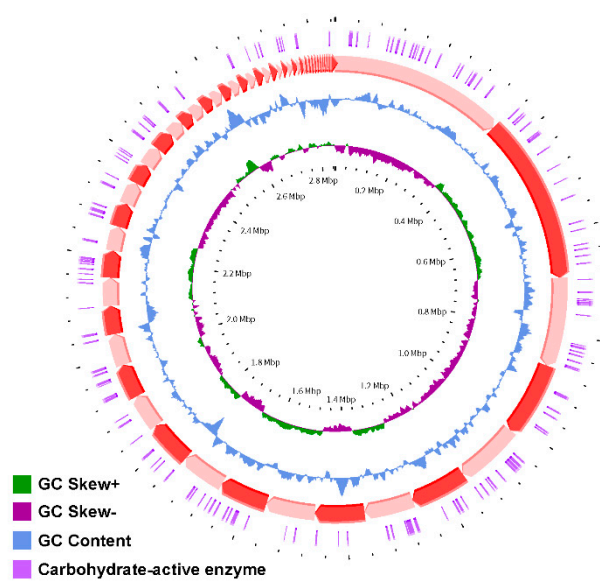

Figure S4. Draft genome of *Akkermansia*.
