# Supplementary material for: Metagenomic Insights into the Anti-Obesity Effect of a Polysaccharide from Saccharina japonica
Source: Foods. 2023 Feb 3;12(3):665. doi: 10.3390/foods12030665 (PMC9914707; doi:10.3390/foods12030665)
Supplement: Supplementary file 1 [file foods-12-00665-s001.zip]

Archive with 4 entries (4 files):
- FIgure.supplement.pdf
- Table S1.xlsx
- Table S2.xlsx
- Table S3.xlsx
