# Supplementary material for: Metagenomic Insights into the Anti-Obesity Effect of a Polysaccharide from Saccharina japonica
Source: Foods. 2023 Feb 3;12(3):665. doi: 10.3390/foods12030665 (PMC9914707; doi:10.3390/foods12030665)
Supplement: Supplementary file 1 [file foods-12-00665-s001.zip › Table S1.xlsx]

## Sheet: Sheet1
Sample lD	InsertSize(bp)	SeqStrategy	RawReads(#)	Raw Base(GB)	%GC	Clean Reads(#)	Cleaned(%)	Clean %GC	AterHostRemoved Reads(#)	HostRemoved(%)	AterHostRemoved %GC
Control-1	350	(150:150)	58531117	20	47	57161315	0.976597	47	45890541	0.197175	48
Control-2	350	(150:150)	47631468	16.3	46	46582874	0.977985	47	19611810	0.578991	52
Control-3	350	(150:150)	56825505	19.5	52	55577512	0.978038	52	41238465	0.258001	53
Control-4	350	(150:150)	55954541	19.2	52	54760375	0.978658	52	35551531	0.35078	54
Model-1	350	(150:150)	50009096	17.1	53	48871177	0.977246	53	35484121	0.273925	55
Model-2	350	(150:150)	50951274	17.4	55	49798070	0.977367	56	37771255	0.241512	57
Model-3	350	(150:150)	37801059	12.9	48	37001606	0.978851	48	28741234	0.223244	49
Model-4	350	(150:150)	35492920	12.1	53	34702496	0.97773	53	25547682	0.263809	55
SJC-1	350	(150:150)	42867250	14.3	44	41631008	0.971161	44	14328178	0.655829	49
SJC-2	350	(150:150)	47805564	16	51	46298925	0.968484	51	29836076	0.355577	54
SJC-3	350	(150:150)	65042708	22.3	51	63758203	0.980251	51	43858023	0.31212	53
SJC-4	350	(150:150)	41674118	13.9	51	40538030	0.972739	51	27933653	0.310927	53
