# Supplementary material for: Metagenomic Insights into the Anti-Obesity Effect of a Polysaccharide from Saccharina japonica
Source: Foods. 2023 Feb 3;12(3):665. doi: 10.3390/foods12030665 (PMC9914707; doi:10.3390/foods12030665)
Supplement: Supplementary file 1 [file foods-12-00665-s001.zip › Table S2.xlsx]

## Sheet: Sheet1
Reassembled bins stats									JS divergence
bin	completeness	contamination	GC	lineage	N50	size	NCBI BLAST name	Z-score	Coraliomargarita_sp._CC10_contig	Coraliomargarita_sp._CC11_contig	Coraliomargarita_sp._CC19_contig	Coraliomargarita_sp._CC21_contig	Coraliomargarita_sp._CC4_105_contig	Coraliomargarita_sp._CC4_contig	Coraliomargarita_sp._CC6_contig	Coraliomargarita_sp._CC8_contig	Formosa_algae_KMM3553	Formosa_algae_KMM8021	Kiritimatiellales_sp._F21_contig	Mariniflexile_fucanivorans_DSM_18792
bin.1.orig	82.14	0.843	0.472	Clostridiales	8754	2717552	Firmicutes; Clostridia; Eubacteriales; Clostridiaceae; Hungatella; Hungatella hathewayi	0.88698	0.0368887	0.0369815	0.0369211	0.0365637	0.0358616	0.0366307	0.0362455	0.0366075	0.0401675	0.0401675	0.0462866	0.0394247
bin.101.permissive	90.53	0	0.512	Clostridiales	22599	3265503	Firmicutes; Clostridia; Eubacteriales; Clostridiaceae; Lactonifactor; Lactonifactor longoviformis	0.91026	0.046346	0.0463533	0.046254	0.0454294	0.0439256	0.0452727	0.0442568	0.0454765	0.0416262	0.0416262	0.0551457	0.0380376
bin.118.strict	94.06	2.516	0.591	Bacteroidetes	125128	2945984	Firmicutes; Clostridia; Eubacteriales; Oscillospiraceae; Ruthenibacterium；Ruthenibacterium lactatiformans	0.99494	0.0370877	0.0370949	0.0370672	0.0370499	0.0362673	0.0370828	0.0364374	0.0370586	0.022901	0.022901	0.0544215	0.0249894
bin.122.strict	95.13	6.089	0.599	Bacteroidetes	120145	3519332	Firmicutes; Clostridia; Eubacteriales; Lachnospiraceae; unclassified Lachnospiraceae; Lachnospiraceae bacterium 28-4	0.92412	0.0322655	0.0322856	0.0322612	0.0323206	0.0317202	0.032361	0.0318577	0.0323082	0.0224809	0.0224809	0.0486175	0.0236408
bin.124.permissive	93.96	0.362	0.587	Clostridiales	22260	3161522	Firmicutes; Clostridia; Eubacteriales; Oscillospiraceae; Oscillospiraceae incertae sedis; [Clostridium] methylpentosum	0.83729	0.0372016	0.0371802	0.0371551	0.037062	0.0358991	0.0369756	0.0362691	0.0370747	0.0367064	0.0367064	0.045848	0.0355238
bin.130.strict	98.31	0.988	0.476	Clostridiales	81512	4169316	Firmicutes; Clostridia; Eubacteriales; Clostridiaceae; Lactonifactor; Lactonifactor longoviformis	0.9281	0.0403518	0.0403826	0.0403318	0.0405217	0.0391748	0.0405199	0.0396278	0.0405725	0.0363063	0.0363063	0.0513574	0.0333852
bin.137.strict	98.93	2.56	0.528	Clostridiales	62624	3916297	Firmicutes; Clostridia; Eubacteriales; Oscillospiraceae; Oscillospiraceae incertae sedis; [Clostridium] methylpentosum	0.87566	0.0483384	0.0483959	0.048328	0.0481056	0.046705	0.0480429	0.0472682	0.0481489	0.0474771	0.0474771	0.0552085	0.045299
bin.147.strict	95.18	1.265	0.48	Clostridiales	69537	3751248	Firmicutes; Clostridia; Eubacteriales; Lachnospiraceae; Shuttleworthia; unclassified Shuttleworthia; Shuttleworthia sp. MSX8B	0.81572	0.0399496	0.0399743	0.0399234	0.0393877	0.0382997	0.0393986	0.0386456	0.039409	0.0362866	0.0362866	0.0473032	0.0343292
bin.150.permissive	72.09	0.632	0.502	Clostridiales	6310	3144923	Bacteroidetes; Bacteroidia; Bacteroidales; Rikenellaceae; Alistipes; Alistipes senegalensis	0.99119	0.0400845	0.0401572	0.0400512	0.0395879	0.0383654	0.0394312	0.0387109	0.0395892	0.041275	0.041275	0.0470822	0.0378003
bin.191.strict	95.49	1.231	0.445	Lachnospiraceae	57717	3588658	Firmicutes; Clostridia; Eubacteriales; Clostridiaceae; Hungatella; Hungatella hathewayi	0.90709	0.0447208	0.044861	0.0447349	0.0448292	0.0436739	0.0447175	0.0441368	0.0448499	0.0424304	0.0424304	0.0532399	0.0378147
bin.22.orig	98.88	0.929	0.428	Bacteroidales	35780	4755038	Bacteroidetes; Bacteroidia; Bacteroidales; Bacteroidaceae; Bacteroides; Bacteroides cellulosilyticus	0.9977	0.0426478	0.0426402	0.042545	0.0427259	0.0410065	0.042481	0.0413314	0.0427733	0.0244535	0.0244535	0.0544977	0.0231845
bin.223.orig	94.49	1.305	0.427	Bacteroidales	26622	5350010	Firmicutes; Clostridia; Eubacteriales; Lachnospiraceae; Schaedlerella; Schaedlerella arabinosiphila	0.83269	0.0428623	0.0428423	0.0428479	0.0428202	0.0411564	0.0428939	0.0418541	0.0429008	0.0255373	0.0255373	0.051956	0.0256294
bin.225.orig	97.67	0	0.468	Bacteroidales	53091	3769044	Firmicutes; Clostridia; Eubacteriales; Clostridiaceae; Clostridium; Clostridium porci	0.87043	0.0434829	0.0434523	0.0433776	0.0432445	0.0416289	0.0430994	0.0419526	0.0432955	0.0255506	0.0255506	0.0555137	0.0243855
bin.245.permissive	85.34	1.476	0.532	Clostridiales	12281	3508917	Firmicutes; Clostridia; Eubacteriales; Lachnospiraceae; Muricomes; Muricomes intestini	0.89133	0.0355634	0.0355831	0.0355425	0.0354713	0.034215	0.035479	0.034673	0.035515	0.0371144	0.0371144	0.04111	0.0345588
bin.286.strict	93.92	0.632	0.542	Clostridiales	16498	4131406	Firmicutes; Clostridia; Eubacteriales; Oscillospiraceae; Anaeromassilibacillus; Anaeromassilibacillus senegalensis	0.83266	0.0452614	0.0452639	0.04521	0.0446905	0.0432951	0.0446518	0.0436422	0.0447075	0.0410515	0.0410515	0.0519595	0.039945
bin.315.orig	84.17	0.233	0.588	Clostridiales	6785	2590108	Firmicutes; Clostridia; Eubacteriales; Clostridiaceae; Hungatella; Hungatella hathewayi; Hungatella hathewayi 12489931	0.85342	0.0425596	0.0426157	0.0425655	0.0436076	0.0427937	0.043649	0.0432724	0.0436504	0.0433863	0.0433863	0.0533327	0.0425676
bin.325.strict	80.86	2.224	0.514	Enterobacteriaceae	4322	3824316	Proteobacteria; Gammaproteobacteria; Enterobacterales; Enterobacteriaceae; Escherichia; Escherichia coli	0.99939	0.0303987	0.0302738	0.0302928	0.0297983	0.0290192	0.0297173	0.0289815	0.0297699	0.0420308	0.0420308	0.0542747	0.0399178
bin.330.strict	60.49	2.92	0.519	Clostridiales	3293	2985387	Bacteroidetes; Bacteroidia; Bacteroidales; Rikenellaceae; Alistipes; unclassified Alistipes; Alistipes sp. HGB5	0.99637	0.0444252	0.0444741	0.0443726	0.0443039	0.0427037	0.0441835	0.0432097	0.0443716	0.0385531	0.0385531	0.0473977	0.0353778
bin.331.permissive	50.58	0.632	0.453	Clostridiales	2575	1744721	Bacteroidetes; Bacteroidia; Bacteroidales; Bacteroidaceae; Bacteroides; Bacteroides acidifaciens	0.99853	0.039688	0.0397491	0.039671	0.039176	0.0382168	0.0391846	0.0386483	0.039239	0.0355175	0.0355175	0.0520512	0.0347262
bin.34.strict	95.31	0.672	0.524	Clostridiales	76681	3508561	Firmicutes; Clostridia; Eubacteriales; Lachnospiraceae; Schaedlerella; Schaedlerella arabinosiphila	0.87504	0.0392325	0.0392448	0.0392214	0.0387683	0.0377139	0.0388203	0.0380768	0.0387786	0.0368922	0.0368922	0.0540013	0.0362369
bin.93.orig	95.54	0.69	0.461	Clostridiales	9275	3333476	Firmicutes; Clostridia; Eubacteriales; Lachnospiraceae; Schaedlerella; Schaedlerella arabinosiphila	0.90477	0.0370669	0.0370798	0.0370399	0.0365794	0.0353483	0.0365861	0.0357982	0.0366469	0.0376013	0.0376013	0.0437529	0.0362072
bin.99.permissive	70.9	4.777	0.553	Clostridiales	4720	2516836	Bacteroidetes; Bacteroidia; Bacteroidales; Bacteroidaceae; Bacteroides; Bacteroides uniformis	0.99699	0.0429871	0.0430672	0.0429844	0.0429772	0.0420733	0.0428865	0.0424033	0.0429821	0.0417085	0.0417085	0.0464194	0.0385316
bin.100.strict	77.02	0.447	0.571	Clostridiales	22685	2272537			0.0641878	0.0641181	0.0640869	0.0618943	0.0605065	0.0618074	0.0609646	0.0619641	0.0578506	0.0578506	0.0837104	0.0574659
bin.102.orig	96.76	1.34	0.436	Lachnospiraceae	71241	3945928			0.069051	0.0690456	0.0689646	0.0680964	0.0661243	0.067952	0.0667452	0.0681266	0.04825	0.04825	0.0841051	0.043985
bin.103.strict	89.11	0.806	0.645	Actinobacteria	15127	1789013			0.061968	0.0617544	0.0617744	0.0598144	0.059556	0.0597606	0.0593129	0.0597713	0.0635233	0.0635233	0.0958104	0.0680767
bin.104.strict	84.09	1.871	0.456	Lachnospiraceae	20676	2852097			0.0604876	0.0603477	0.060398	0.0591475	0.0574644	0.0592154	0.0580325	0.0591854	0.0427349	0.0427349	0.0814027	0.044713
bin.105.strict	94.56	1.538	0.439	Bacteroidales	58907	5702816			0.0462056	0.0461386	0.0461049	0.045998	0.0441741	0.0459052	0.0446985	0.0460585	0.0264117	0.0264117	0.0570659	0.0261684
bin.106.orig	89.94	3.825	0.6	Clostridiales	14950	2125733			0.0620237	0.0618467	0.0619005	0.0611173	0.0596883	0.0611477	0.060043	0.0611429	0.0425213	0.0425213	0.0852223	0.0427265
bin.107.strict	54.08	2.247	0.526	Lachnospiraceae	3803	1662643			0.063909	0.063999	0.0638769	0.063452	0.0621352	0.0633392	0.0627756	0.0634709	0.0451445	0.0451445	0.0818446	0.0419398
bin.108.orig	86.77	0	0.453	Bacteria	6673	2259909			0.0476912	0.0476123	0.0475541	0.0463761	0.0454244	0.0462678	0.045469	0.0463897	0.0277852	0.0277852	0.0715211	0.0295001
bin.109.strict	93.56	0.097	0.423	Lachnospiraceae	45800	3276352			0.0576782	0.057734	0.0576207	0.0570954	0.0555665	0.0568624	0.0559581	0.057096	0.0517998	0.0517998	0.0710375	0.0489538
bin.10.orig	98.83	0.701	0.457	Lachnospiraceae	60734	3248629			0.0487838	0.0487607	0.0487173	0.0478015	0.046442	0.0477278	0.0468421	0.0478074	0.0414218	0.0414218	0.0675289	0.0402072
bin.110.orig	95.88	0.566	0.541	Bacteroidales	35401	2416261			0.044361	0.0444444	0.0443168	0.0439129	0.0435368	0.043838	0.0435063	0.0439284	0.0333627	0.0333627	0.0675787	0.0328376
bin.111.permissive	93.61	2.56	0.514	Bacteria	26844	2389163			0.0480204	0.0481421	0.048043	0.049618	0.0488	0.0496025	0.0492391	0.0496391	0.0436353	0.0436353	0.0587526	0.0442861
bin.112.strict	79.59	2.08	0.606	Clostridiales	5744	2491839			0.0624928	0.0623686	0.0623298	0.0607612	0.059005	0.0605748	0.0593828	0.0607833	0.0433104	0.0433104	0.0763881	0.0426755
bin.113.strict	81.1	1.347	0.565	Clostridiales	6758	2016356			0.0610824	0.0610305	0.0609968	0.0597463	0.0587516	0.0596828	0.0590382	0.0597666	0.051296	0.051296	0.0844563	0.0537118
bin.114.permissive	97.98	0.964	0.552	Clostridiales	23940	2658776			0.0499022	0.0498071	0.0498618	0.048526	0.047493	0.0486552	0.0478699	0.0485672	0.0440589	0.0440589	0.0697748	0.046009
bin.115.strict	97.65	1.342	0.545	Clostridiales	42501	2128883			0.0625024	0.0623935	0.0623335	0.0611765	0.0601022	0.0609817	0.0602484	0.0611959	0.0517801	0.0517801	0.085116	0.0537038
bin.116.orig	70.11	1.307	0.524	Clostridiales	2918	1594906			0.0561306	0.0561658	0.056038	0.055931	0.0552978	0.055758	0.0553478	0.055967	0.0495216	0.0495216	0.0801754	0.045955
bin.117.strict	80.94	0.314	0.494	Clostridia	6170	1855606			0.0710342	0.0708311	0.0708624	0.0680394	0.0669037	0.0680575	0.0670778	0.0680567	0.0581207	0.0581207	0.0990929	0.0636925
bin.119.strict	97.11	0	0.453	Clostridiales	101345	2084150			0.0511444	0.0511232	0.0510357	0.0505232	0.0497833	0.0504309	0.0498671	0.0505255	0.0450604	0.0450604	0.0691815	0.0438053
bin.11.strict	90.88	0	0.592	Clostridiales	19723	2124395			0.0657797	0.0655572	0.0655886	0.0623995	0.0610974	0.0623801	0.0613629	0.0624202	0.047737	0.047737	0.0933397	0.0507808
bin.120.orig	95.31	2.075	0.512	Bacteroidales	9629	2386610			0.0506794	0.0506386	0.0505478	0.0498772	0.0493986	0.0497316	0.0492269	0.0498345	0.0340048	0.0340048	0.080644	0.037153
bin.121.orig	96.68	0.337	0.451	Lachnospiraceae	49473	2875627			0.0543619	0.054364	0.0542882	0.0526323	0.0516753	0.0525836	0.0519554	0.052664	0.0417328	0.0417328	0.0792844	0.0416129
bin.123.strict	58.96	3.448	0.622	Bacteria	4454	2071091			0.0618051	0.06174	0.0617362	0.0601044	0.0589224	0.0601217	0.0593299	0.0601304	0.0487386	0.0487386	0.0814985	0.0515915
bin.125.strict	97.98	0.335	0.519	Clostridiales	122538	2411218			0.0759734	0.0757465	0.0757284	0.0733012	0.0715003	0.0730599	0.0718603	0.0733675	0.055304	0.055304	0.101557	0.0587541
bin.126.permissive	79.56	0.671	0.458	Clostridiales	8201	1790753			0.0648496	0.0648281	0.064789	0.0645135	0.0641167	0.0645469	0.0642749	0.0645292	0.0560556	0.0560556	0.0895066	0.0595167
bin.127.permissive	77.04	0.316	0.475	Clostridiales	20869	3008135			0.053885	0.0537515	0.0536665	0.0528102	0.0511259	0.0525074	0.0512414	0.052791	0.0395793	0.0395793	0.070917	0.0397202
bin.128.orig	96.53	0.574	0.478	Lachnospiraceae	39220	3733695			0.058629	0.0587178	0.058623	0.0586741	0.0572951	0.0586166	0.0579402	0.0587007	0.0427875	0.0427875	0.0712892	0.0403159
bin.129.permissive	93.98	1.985	0.342	Lactobacillus	20110	1866972			0.0585047	0.0584657	0.058373	0.0596579	0.0580905	0.0593985	0.0582724	0.0596659	0.0518129	0.0518129	0.0699274	0.0477532
bin.12.orig	60.58	0.156	0.599	Bacteria	3671	1744502			0.0601695	0.0602039	0.0601434	0.059777	0.0585137	0.0597058	0.0590787	0.0598282	0.0479679	0.0479679	0.0735831	0.0477038
bin.131.orig	71.67	0.671	0.601	Clostridiales	4521	2102078			0.0530355	0.052942	0.0528975	0.0500847	0.0493295	0.0499884	0.0494501	0.0500916	0.0468754	0.0468754	0.0762013	0.0490511
bin.132.strict	96.22	2.291	0.549	Bacteria	26268	2116141			0.0452293	0.0452757	0.0451814	0.0461109	0.0452498	0.0460612	0.0454998	0.0461467	0.0397781	0.0397781	0.0602407	0.0398786
bin.133.strict	53.87	4.31	0.611	Bacteria	4795	2210864			0.0625401	0.0624653	0.0624562	0.0612386	0.0597534	0.0612138	0.0602059	0.06126	0.0435134	0.0435134	0.0758753	0.0428094
bin.134.strict	95.74	1.418	0.529	Clostridiales	57122	2837851			0.0561316	0.0559199	0.0560005	0.0539407	0.0529898	0.0540581	0.0532468	0.0539356	0.0433577	0.0433577	0.0830415	0.0483856
bin.135.strict	51.86	3.02	0.607	Clostridiales	9020	1355193			0.0492867	0.0491714	0.0491939	0.048477	0.0473812	0.0484996	0.0476857	0.0484896	0.0395125	0.0395125	0.0705481	0.0393432
bin.136.orig	96.83	1.918	0.37	Clostridiales	16334	2813209			0.049571	0.0494991	0.0494315	0.0480777	0.0468189	0.0478962	0.047157	0.0481246	0.0339785	0.0339785	0.0755496	0.0335241
bin.138.permissive	78.22	3.243	0.464	Clostridiales	5296	1846074			0.0535549	0.0535053	0.0534312	0.0530624	0.0518082	0.0529226	0.0521658	0.053097	0.0384279	0.0384279	0.0701628	0.0404448
bin.139.orig	88.2	3.138	0.465	Lachnospiraceae	9327	3634474			0.0732943	0.0732966	0.073227	0.0721853	0.070431	0.0720999	0.0710587	0.0722195	0.052715	0.052715	0.0901596	0.0502835
bin.140.strict	99.16	0.806	0.608	Clostridia	284316	2651403			0.0501072	0.0500669	0.0500622	0.0503991	0.049301	0.0504564	0.0497806	0.0504531	0.042579	0.042579	0.0656767	0.0445647
bin.141.permissive	88.75	0.503	0.627	Clostridiales	27199	2284596			0.0612865	0.061218	0.0611512	0.0592911	0.0579695	0.0591862	0.0583052	0.0593425	0.0441891	0.0441891	0.0768288	0.045361
bin.142.strict	61.38	0.854	0.467	Bacteria	67825	853178			0.164908	0.165062	0.164637	0.164638	0.163728	0.163752	0.163476	0.164713	0.158284	0.158284	0.19821	0.14972
bin.143.strict	91.28	0.89	0.489	Lachnospiraceae	40346	3573591			0.0574615	0.057563	0.0574659	0.0570978	0.05582	0.0570586	0.0565064	0.0571479	0.0427473	0.0427473	0.0698716	0.0401608
bin.144.orig	63.07	1.111	0.507	Bacteroidales	4945	1610121			0.0446077	0.0446643	0.0445421	0.0442965	0.0437885	0.044177	0.0437266	0.044301	0.0306276	0.0306276	0.0641963	0.0294678
bin.145.strict	95.07	1.153	0.452	Bacteroidales	25077	3321288			0.038222	0.0381997	0.0381029	0.0377277	0.0364571	0.0375198	0.0366519	0.0377344	0.0208815	0.0208815	0.0587136	0.0218741
bin.146.strict	67.61	2.705	0.487	Lachnospiraceae	20485	2839884			0.0622056	0.0623713	0.062167	0.061842	0.0604868	0.0615742	0.0610167	0.0618997	0.0489444	0.0489444	0.0737573	0.0448086
bin.148.strict	96.47	0	0.586	Clostridiales	14755	2606427			0.0491495	0.0491717	0.0490639	0.0480073	0.0469268	0.0477765	0.0472138	0.0480408	0.0425306	0.0425306	0.06451	0.0426453
bin.149.strict	88.86	0.892	0.473	Clostridia	137521	2038400			0.0724259	0.0722434	0.0722197	0.069998	0.0690804	0.0698809	0.069047	0.0699859	0.0638398	0.0638398	0.103695	0.0696901
bin.14.strict	88.92	0.935	0.48	Lachnospiraceae	29362	2259849			0.0605996	0.0605272	0.0605145	0.0592569	0.0578617	0.0591898	0.0582421	0.0592421	0.0423524	0.0423524	0.0840513	0.0426796
bin.151.strict	90.85	0.507	0.494	Bacteroidetes	22562	2270414			0.0423193	0.0423739	0.0422617	0.0419599	0.0415613	0.0418436	0.0414178	0.0419761	0.0373468	0.0373468	0.0579572	0.0384153
bin.152.strict	80.67	1.275	0.437	Clostridia	17693	1331859			0.0737997	0.0735625	0.0736067	0.0725107	0.0715655	0.0725158	0.0715449	0.072509	0.0606506	0.0606506	0.107227	0.063284
bin.153.strict	66.5	2.013	0.589	Clostridiales	10823	1517306			0.0790763	0.0789088	0.0789367	0.0780832	0.0765714	0.0780764	0.0770684	0.0781673	0.0617347	0.0617347	0.101073	0.0623626
bin.154.orig	95.61	0.977	0.593	Bacteroidetes	53318	2446337			0.0391823	0.039154	0.0391618	0.0387391	0.0384022	0.0387997	0.0383769	0.038693	0.0292563	0.0292563	0.0646807	0.0303776
bin.155.orig	97.54	0.377	0.531	Bacteroidales	33777	2310940			0.041792	0.0417824	0.0416933	0.0409996	0.0404685	0.0409209	0.0403753	0.0410474	0.0307165	0.0307165	0.0651114	0.0306335
bin.156.permissive	99.23	0.353	0.394	Campylobacterales	161090	1790451			0.0703745	0.0702735	0.0702185	0.0669901	0.0675333	0.0668764	0.0669813	0.0669128	0.0665072	0.0665072	0.107838	0.0707392
bin.157.permissive	53.55	0	0.607	Bacteria	5111	1518390			0.0504828	0.0503844	0.0503793	0.0487562	0.0477593	0.0488191	0.0480918	0.0488171	0.0366699	0.0366699	0.074343	0.0391331
bin.158.strict	54.71	0	0.533	Clostridiales	3904	1749459			0.0556727	0.0557595	0.0556896	0.0543917	0.0536658	0.0543951	0.0541372	0.0544388	0.0512315	0.0512315	0.0684939	0.053873
bin.159.strict	89.48	1.018	0.572	Clostridiales	14224	3667183			0.0619206	0.0618386	0.0617021	0.0596137	0.057574	0.0591217	0.0577544	0.0596175	0.0485783	0.0485783	0.0756389	0.045012
bin.15.strict	96.02	0.838	0.566	Clostridiales	68693	1864901			0.062546	0.0624378	0.0623818	0.0613175	0.0602775	0.0611649	0.060416	0.061337	0.0526765	0.0526765	0.0866389	0.0542545
bin.160.orig	83.3	0	0.469	Bacteria	64958	962093			0.157861	0.157935	0.157546	0.157101	0.155903	0.156242	0.155664	0.157222	0.154233	0.154233	0.184812	0.146675
bin.161.orig	97.58	1.724	0.453	Lachnospiraceae	36361	4432419			0.0758364	0.0758204	0.0757345	0.0743763	0.0723933	0.0741777	0.0730158	0.0744115	0.0561928	0.0561928	0.0955485	0.0528632
bin.162.orig	66.06	0	0.518	Bacteria	4481	2056705			0.049513	0.0496343	0.04956	0.0495545	0.0485954	0.0496349	0.0490646	0.0495875	0.0476548	0.0476548	0.060426	0.0441775
bin.163.strict	62.03	0	0.44	Bacteria	18044	697898			0.179134	0.179369	0.178932	0.178832	0.178664	0.177982	0.178394	0.178889	0.179184	0.179184	0.217017	0.172326
bin.164.permissive	97.66	1.245	0.459	Lachnospiraceae	93544	3478307			0.062658	0.0627019	0.0626214	0.0621134	0.0606512	0.062057	0.0612632	0.0621513	0.0485267	0.0485267	0.0789968	0.0453918
bin.165.strict	83.49	1.949	0.475	Lachnospiraceae	13375	2367989			0.0496271	0.0496154	0.0496275	0.0490804	0.047892	0.0492117	0.0484173	0.0491107	0.0426082	0.0426082	0.0677218	0.0432779
bin.166.strict	89.98	2.339	0.443	Lachnospiraceae	21358	3132811			0.0537175	0.0537501	0.0536748	0.0530182	0.0518167	0.0529764	0.0522197	0.053046	0.0480915	0.0480915	0.0684599	0.0483689
bin.167.strict	93.32	1.342	0.59	Clostridiales	29986	2603746			0.0580185	0.0579247	0.0579173	0.0565322	0.0553663	0.0565465	0.0557212	0.0565534	0.0427494	0.0427494	0.0736287	0.04523
bin.168.strict	94.74	4.823	0.641	Bacteroidetes	64102	2114108			0.0449627	0.0449747	0.0448731	0.0441085	0.0435811	0.0439557	0.0434855	0.0441367	0.0318445	0.0318445	0.0697661	0.0332014
bin.16.orig	91.29	0.965	0.463	Bacteroidales	27820	2216614			0.045338	0.0453951	0.0452919	0.0447114	0.0443951	0.04468	0.0443264	0.0447323	0.034888	0.034888	0.0684479	0.0350034
bin.170.strict	86.89	0.161	0.443	Bacteria	4081	1464890			0.0855292	0.0855712	0.08538	0.082663	0.0823635	0.0822333	0.0821472	0.0826623	0.0734115	0.0734115	0.115271	0.0716164
bin.171.strict	61.65	0.862	0.623	Bacteria	5285	2284648			0.0577071	0.0575898	0.0575767	0.0554404	0.0540545	0.0553674	0.0544488	0.0554898	0.0437495	0.0437495	0.0724457	0.0459195
bin.172.strict	86.23	1.105	0.468	Lachnospiraceae	12822	3330943			0.0533178	0.0534696	0.0533388	0.0528005	0.0517587	0.0527157	0.0523307	0.0528387	0.047368	0.047368	0.064015	0.0444088
bin.173.strict	99.47	0.104	0.398	Lactobacillales	54058	2200264			0.0555129	0.0555802	0.055408	0.0564456	0.0552215	0.0560551	0.0552759	0.0564246	0.0533932	0.0533932	0.0671678	0.0499489
bin.174.permissive	80.15	1.957	0.529	Clostridiales	7471	1676794			0.0612513	0.0611436	0.0611146	0.0592081	0.0581	0.0590953	0.0583259	0.0592464	0.0485669	0.0485669	0.0851495	0.0506295
bin.175.orig	95.97	2.023	0.458	Lachnospiraceae	59809	3700980			0.0675334	0.0675737	0.0675297	0.0668154	0.065325	0.0668379	0.0660832	0.0668613	0.0513893	0.0513893	0.0865274	0.0497989
bin.176.permissive	84.11	2.013	0.611	Clostridiales	13160	2433279			0.0515529	0.0515769	0.0514806	0.0502302	0.0488663	0.0500451	0.0493887	0.0502889	0.0419778	0.0419778	0.0601132	0.0398669
bin.177.permissive	57.36	0	0.52	Actinobacteria	2057	1302076			0.0557118	0.0555157	0.0555378	0.0538312	0.0535131	0.0538733	0.0534712	0.0538676	0.0541278	0.0541278	0.0871138	0.058557
bin.178.strict	84.78	2.704	0.461	Lachnospiraceae	8689	2346356			0.0557651	0.0557982	0.0557081	0.0539076	0.05335	0.053856	0.0535426	0.0538947	0.0463702	0.0463702	0.0809528	0.0465446
bin.179.orig	97.54	0.503	0.542	Bacteroidales	41741	2456180			0.0453453	0.0454199	0.0452626	0.0442324	0.0439933	0.0440713	0.0438612	0.0442724	0.0329553	0.0329553	0.0695156	0.0339408
bin.17.strict	61.17	0	0.454	Bacteria	75683	759965			0.173837	0.174041	0.17359	0.174041	0.173505	0.173139	0.173185	0.174117	0.17515	0.17515	0.203392	0.166345
bin.180.strict	94.86	1.776	0.447	Lachnospiraceae	19166	4260380			0.0563317	0.0564334	0.056296	0.0559674	0.0542593	0.055774	0.0548417	0.0560205	0.0496155	0.0496155	0.061405	0.0435021
bin.181.orig	90.93	1.257	0.568	Bacteroidales	24837	2213291			0.0478771	0.0478511	0.0477635	0.0467984	0.0464904	0.0467524	0.046381	0.0468492	0.0372246	0.0372246	0.0785529	0.0374313
bin.182.orig	98.88	0.384	0.456	Bacteroidales	56709	3475728			0.0426583	0.0426537	0.0425664	0.0428591	0.0416862	0.0427099	0.0419004	0.0428713	0.026332	0.026332	0.05794	0.0274205
bin.183.permissive	91.67	3.46	0.461	Lachnospiraceae	31437	3003545			0.0508189	0.0507793	0.0507735	0.0494792	0.048309	0.049586	0.0488038	0.0495147	0.0425481	0.0425481	0.0684048	0.0438595
bin.184.permissive	97	0	0.377	Clostridiales	200220	1811070			0.0788689	0.0786783	0.0786506	0.0762274	0.0752147	0.0761178	0.0751991	0.0762462	0.0633697	0.0633697	0.103164	0.0662666
bin.185.strict	84.84	0	0.585	Clostridiales	22071	2505560			0.0575283	0.0574319	0.0574669	0.0553663	0.0541185	0.0555161	0.054595	0.0553918	0.0435277	0.0435277	0.074197	0.0458136
bin.186.strict	70.61	1.724	0.64	Bacteria	7030	1813618			0.0634673	0.0633515	0.0633605	0.0611398	0.0599394	0.0612047	0.0603573	0.0611623	0.0407546	0.0407546	0.0816633	0.0442798
bin.187.orig	92.96	0.446	0.619	Deltaproteobacteria	9128	2325601			0.0552582	0.0551505	0.0551726	0.0525697	0.052342	0.0525887	0.0523053	0.0525258	0.0486359	0.0486359	0.098212	0.0525339
bin.188.permissive	89.65	1.23	0.607	Clostridiales	16892	2615373			0.0571216	0.0571981	0.0569924	0.0562648	0.0546818	0.0557906	0.0550097	0.0562978	0.0453405	0.0453405	0.0667314	0.0407498
bin.189.orig	70.68	0	0.647	Bacteria	163621	1820936			0.0444749	0.0444906	0.0443883	0.0435847	0.0429675	0.0434536	0.0429618	0.0436069	0.0323365	0.0323365	0.0676456	0.0325143
bin.18.strict	95.33	2.784	0.497	Clostridiales	23875	3247797			0.0461174	0.0461563	0.0461256	0.0454257	0.0445638	0.0455187	0.0450156	0.0454519	0.0402147	0.0402147	0.0605821	0.040457
bin.190.strict	87.09	2.013	0.622	Clostridiales	9502	2481227			0.0655078	0.0653588	0.0653942	0.0633072	0.0618538	0.0633455	0.0622412	0.0633408	0.0489664	0.0489664	0.0805478	0.0505406
bin.192.strict	89.57	0.974	0.482	Lachnospiraceae	24775	3039195			0.0520987	0.0520143	0.0520599	0.0513226	0.0500108	0.0514629	0.0504945	0.0513115	0.0433376	0.0433376	0.07067	0.0441306
bin.193.strict	87.59	1.342	0.601	Clostridiales	22952	2648923			0.0475373	0.0474738	0.047427	0.0458586	0.0447418	0.0457526	0.0450263	0.0458796	0.0332602	0.0332602	0.0644683	0.034883
bin.194.permissive	55.58	0	0.542	Bacteria	7734	1631214			0.0552581	0.0553372	0.0552193	0.0544591	0.0533621	0.0542858	0.0537715	0.0544373	0.0468006	0.0468006	0.0735374	0.0458045
bin.195.strict	77.85	0	0.582	Clostridiales	63807	2240361			0.0669368	0.0668677	0.0668573	0.0655244	0.0640612	0.0654901	0.0645398	0.0655892	0.051423	0.051423	0.0844924	0.0544094
bin.196.permissive	94.97	0	0.521	Deltaproteobacteria	80793	2765485			0.0596754	0.0596363	0.0594568	0.0563449	0.0554837	0.0558314	0.0552638	0.0563233	0.0521429	0.0521429	0.0846644	0.0533666
bin.197.strict	99.03	0.16	0.574	Bacteroidetes	193540	2063886			0.0450427	0.0450248	0.0449406	0.0440975	0.0435679	0.0439089	0.0434583	0.0441188	0.0379996	0.0379996	0.0704545	0.0356175
bin.198.permissive	50.86	0.862	0.498	Bacteria	4232	1596127			0.0576273	0.0575392	0.0575243	0.0570013	0.0554537	0.0570191	0.0559081	0.0570154	0.047219	0.047219	0.0776122	0.0467089
bin.199.strict	94.15	0.097	0.483	Lachnospiraceae	115358	2693493			0.0575303	0.05744	0.0574245	0.0560214	0.0544132	0.0559606	0.0548716	0.0560675	0.0465288	0.0465288	0.0775996	0.0468444
bin.19.strict	75.48	2.528	0.572	Lachnospiraceae	5521	2977109			0.0688377	0.0688455	0.0688153	0.0683813	0.0666417	0.0683429	0.0674232	0.0684128	0.0524457	0.0524457	0.0830514	0.0523278
bin.200.strict	63.48	1.342	0.644	Clostridiales	4272	1651581			0.0582601	0.0582073	0.0581598	0.0563677	0.0553339	0.0563238	0.0556599	0.0563992	0.0515125	0.0515125	0.0738831	0.0524347
bin.201.orig	99.51	0	0.589	Bacteroidetes	95281	1963146			0.0645638	0.0643981	0.0643847	0.0628236	0.0622926	0.062754	0.0620139	0.0628195	0.0417117	0.0417117	0.103505	0.0452929
bin.202.strict	94.4	0.041	0.561	Clostridiales	25701	2139144			0.0596855	0.0595712	0.0595585	0.0577294	0.0566945	0.0577058	0.0569375	0.0577566	0.0465845	0.0465845	0.083709	0.0493839
bin.203.strict	90.79	0.723	0.575	Deltaproteobacteria	12778	3283097			0.0485363	0.0484062	0.0483615	0.0451795	0.0442448	0.0449258	0.0442163	0.0451625	0.0443055	0.0443055	0.0753775	0.045352
bin.204.strict	75.78	0.116	0.452	Lachnospiraceae	16905	2317136			0.0641138	0.064146	0.064067	0.0634257	0.0621925	0.063328	0.062523	0.0633829	0.0467128	0.0467128	0.0823459	0.0453816
bin.205.strict	87.6	1.845	0.625	Clostridiales	39698	2068439			0.0564594	0.0563677	0.0563854	0.0546574	0.0536043	0.0547596	0.0540033	0.0547115	0.0433952	0.0433952	0.073857	0.0455644
bin.206.orig	98.67	1.32	0.507	Bacteroidales	55953	2695522			0.0372705	0.0373471	0.0372504	0.0377209	0.0375431	0.0376881	0.0374436	0.0377178	0.0291975	0.0291975	0.0562776	0.0308562
bin.207.strict	87.98	1.593	0.484	Lachnospiraceae	23864	3962860			0.0662003	0.0663245	0.0661153	0.0655705	0.0637414	0.0651923	0.0643315	0.0656172	0.0494216	0.0494216	0.0751411	0.0456373
bin.208.strict	90.15	1.364	0.476	Lachnospiraceae	33010	3205350			0.0629128	0.0627604	0.0627954	0.0612637	0.0594584	0.061267	0.0599737	0.0612826	0.0497109	0.0497109	0.0815382	0.0501793
bin.209.strict	71.29	1.12	0.439	Lachnospiraceae	5639	2003223			0.0556214	0.0556923	0.0556203	0.0548744	0.0539261	0.0548677	0.0543511	0.0548673	0.0453109	0.0453109	0.0695098	0.0442934
bin.20.permissive	79.21	0.134	0.594	Clostridiales	4251	2276784			0.0533653	0.053299	0.053197	0.0515779	0.0502448	0.0513148	0.0504241	0.0516227	0.0470364	0.0470364	0.0690586	0.0448182
bin.210.permissive	70.29	0	0.597	Bacteria	10675	2268224			0.0545635	0.0544569	0.0544759	0.0532964	0.0517348	0.0532652	0.052244	0.053319	0.0395802	0.0395802	0.0713365	0.0390909
bin.211.strict	96.55	3.357	0.513	Lachnospiraceae	62734	3766956			0.0653564	0.0653241	0.0652069	0.0639124	0.0620606	0.0636237	0.0626001	0.0639688	0.0455547	0.0455547	0.0857966	0.042889
bin.212.permissive	91.51	0	0.524	Clostridiales	23670	2969737			0.0471243	0.0472137	0.0471101	0.0469823	0.0459892	0.0468433	0.0463044	0.0470012	0.0490396	0.0490396	0.056323	0.0477839
bin.213.permissive	69.32	2.852	0.492	Clostridiales	5351	1790514			0.0589302	0.0588729	0.058819	0.0587478	0.0572796	0.0586641	0.0578445	0.0588201	0.0492358	0.0492358	0.0698137	0.0492144
bin.214.strict	77.44	1.303	0.556	Clostridiales	4506	1346738			0.0676975	0.0676147	0.0675588	0.0671454	0.0664768	0.0670782	0.066486	0.0671356	0.0541384	0.0541384	0.0912856	0.0573092
bin.215.strict	92.85	1.342	0.605	Clostridiales	27271	2245268			0.0528081	0.0526794	0.0527039	0.050581	0.0492843	0.0506195	0.0496051	0.0506433	0.0512356	0.0512356	0.0700419	0.050173
bin.216.strict	94.15	0.943	0.513	Bacteroidales	30583	2336527			0.0414927	0.04156	0.0414152	0.0412877	0.0409487	0.0411308	0.0408321	0.0413267	0.0340262	0.0340262	0.0676822	0.032904
bin.217.strict	96.22	0.094	0.286	Bacteria	12581	2610276			0.0542368	0.0542457	0.0541104	0.053711	0.0521771	0.0534826	0.0525249	0.0537642	0.035535	0.035535	0.0705848	0.033313
bin.218.strict	91.52	1.342	0.589	Clostridiales	11720	2452498			0.0695525	0.0693795	0.0693158	0.0659021	0.0643808	0.0655951	0.0645864	0.0658916	0.0509726	0.0509726	0.0967494	0.0524081
bin.219.permissive	94.92	1.342	0.595	Clostridiales	75161	2464585			0.071464	0.0712223	0.0712617	0.0680774	0.0664564	0.0680135	0.06681	0.0680956	0.0518753	0.0518753	0.0996954	0.0547676
bin.21.strict	94.84	2.912	0.501	Lachnospiraceae	33497	3176997			0.0585607	0.0586021	0.0585423	0.0578572	0.0563886	0.0578351	0.0569683	0.0578994	0.0466312	0.0466312	0.0736377	0.0434109
bin.220.strict	85.14	0.227	0.543	Clostridia	10888	1422588			0.0708788	0.0710241	0.0708628	0.0719988	0.0718815	0.0718522	0.0719677	0.0720904	0.0821799	0.0821799	0.0821315	0.0817301
bin.221.permissive	93.67	2.146	0.438	Lachnospiraceae	74989	3313679			0.065293	0.0653904	0.0652515	0.0647978	0.0635983	0.0646232	0.0640981	0.0648305	0.0525751	0.0525751	0.0851604	0.0494665
bin.222.strict	78.6	3.365	0.608	Bacteroidetes	8039	1828381			0.0446954	0.044724	0.0446193	0.0443229	0.0439965	0.0440738	0.0436735	0.0442447	0.0398333	0.0398333	0.0688367	0.0373025
bin.224.strict	95.46	0	0.548	Clostridiales	19626	2757229			0.047191	0.047146	0.0470843	0.0458069	0.0446249	0.0456905	0.0449027	0.0458452	0.036063	0.036063	0.0662863	0.0358214
bin.226.orig	95.65	2.507	0.513	Lachnospiraceae	31801	3983296			0.0612837	0.0613217	0.0612439	0.060533	0.0590232	0.0604033	0.0596208	0.0605461	0.0466447	0.0466447	0.077151	0.0443545
bin.228.orig	96.68	0.579	0.44	Lachnospiraceae	44911	2748775			0.0591758	0.059137	0.0590799	0.0573231	0.0563296	0.0572956	0.0566746	0.0573501	0.046718	0.046718	0.0890443	0.0472637
bin.229.orig	97.27	0.68	0.599	Clostridiales	65373	2811736			0.0485934	0.0485956	0.0485236	0.0477677	0.0465988	0.0476523	0.0469108	0.0477892	0.0429471	0.0429471	0.0611521	0.0424111
bin.230.strict	67.36	5.476	0.645	Clostridiales	5141	2214089			0.0544189	0.0543822	0.0543533	0.0530283	0.0520387	0.0530348	0.0523598	0.0530569	0.0504476	0.0504476	0.0686576	0.0507771
bin.231.strict	96.42	0.692	0.581	Clostridiales	54875	2311972			0.073201	0.0729211	0.0730245	0.0705045	0.0691813	0.0705538	0.0695143	0.0705164	0.0543407	0.0543407	0.101279	0.0606954
bin.232.strict	97.04	0.88	0.524	Bacteroidales	46060	2160929			0.0649468	0.0649561	0.0647694	0.0634661	0.0630509	0.0631581	0.0627631	0.0635246	0.0491298	0.0491298	0.0922741	0.0494924
bin.233.permissive	86.38	2.225	0.53	Lachnospiraceae	17855	3909977			0.0534752	0.0535208	0.0535063	0.0529332	0.0515932	0.0529671	0.0522051	0.0529474	0.0486122	0.0486122	0.0639193	0.0473478
bin.234.strict	69.05	0	0.486	Bacteria	13831	3092589			0.056113	0.0562113	0.0561541	0.0562455	0.0549398	0.0563059	0.05551	0.0562616	0.0488471	0.0488471	0.0645233	0.0466347
bin.235.orig	98.27	2.586	0.311	Bacteria	35495	2264013			0.0696123	0.0695493	0.0694157	0.0657258	0.0654477	0.0653558	0.0651319	0.0656792	0.0643805	0.0643805	0.102107	0.0666196
bin.236.permissive	96.97	2.147	0.575	Clostridiales	70920	2530090			0.0543172	0.0542729	0.0542238	0.0524985	0.0512635	0.0523991	0.0516833	0.0525541	0.0437811	0.0437811	0.0699152	0.0445121
bin.237.strict	94.15	0.584	0.405	Lachnospiraceae	51118	2555356			0.0515046	0.05147	0.051344	0.0506446	0.0491964	0.0503972	0.0493759	0.050677	0.0406598	0.0406598	0.0690415	0.0373179
bin.238.strict	90.79	1.006	0.596	Clostridiales	18939	2075532			0.054461	0.0543297	0.0543491	0.0524328	0.0512268	0.0524795	0.0515472	0.0524657	0.0441136	0.0441136	0.0758717	0.0441948
bin.239.strict	97.31	0.671	0.506	Clostridiales	99630	1994000			0.066787	0.0665364	0.0666067	0.0646016	0.0632629	0.064647	0.0635105	0.0646449	0.0520274	0.0520274	0.091404	0.0561132
bin.23.orig	74.69	2.586	0.626	Bacteria	8890	2325456			0.0588605	0.0587543	0.0587794	0.0567352	0.0557813	0.056777	0.056142	0.0567354	0.0456097	0.0456097	0.0782015	0.051059
bin.240.strict	66.57	0	0.647	Actinobacteria	5542	1533766			0.0581335	0.0579297	0.0579205	0.0562978	0.0557481	0.0561572	0.0555388	0.0562692	0.059403	0.059403	0.0867494	0.0620537
bin.241.permissive	73.32	1.565	0.607	Clostridiales	7755	2412549			0.0571566	0.0570431	0.0570147	0.055243	0.0539544	0.0551166	0.0541095	0.0551913	0.0480416	0.0480416	0.0780026	0.0487999
bin.242.strict	79.91	1.773	0.5	Lachnospiraceae	18897	3442180			0.0648659	0.0648784	0.0648164	0.0646341	0.0627848	0.0645482	0.0634645	0.0646682	0.0538922	0.0538922	0.0764453	0.0520653
bin.243.orig	58.5	0.862	0.62	Bacteria	3491	2418122			0.0587933	0.0587717	0.0586874	0.0578489	0.0562264	0.0577236	0.056793	0.0579337	0.0423762	0.0423762	0.076458	0.0399598
bin.244.strict	94.62	0	0.418	Bacteria	40774	1362758			0.102719	0.102789	0.102536	0.101368	0.100923	0.100814	0.100666	0.101394	0.0928606	0.0928606	0.136719	0.0854623
bin.246.orig	96.64	3.139	0.505	Bacteroidales	29973	2914065			0.0504102	0.0504578	0.0502797	0.0497028	0.0486347	0.0494162	0.0486411	0.0497662	0.035033	0.035033	0.072786	0.0325838
bin.247.strict	64.76	0.335	0.616	Clostridiales	5389	1746839			0.056701	0.0566973	0.0566516	0.0550017	0.0541179	0.0550283	0.0544609	0.05504	0.0515082	0.0515082	0.0715355	0.0521918
bin.248.strict	89.32	0.671	0.588	Clostridiales	25900	2460914			0.0535622	0.0535623	0.0534915	0.0523204	0.0510414	0.0521569	0.0513873	0.052346	0.0473482	0.0473482	0.0680766	0.0462037
bin.249.strict	93.31	2.237	0.601	Clostridiales	20076	3262339			0.0582795	0.0582063	0.0581227	0.0566473	0.0550437	0.056374	0.0553738	0.0566608	0.0414848	0.0414848	0.0728363	0.0407696
bin.24.strict	93.13	0.692	0.606	Clostridiales	45810	2617733			0.0612764	0.0612197	0.0611754	0.0598626	0.0583226	0.0597228	0.0587253	0.0598957	0.0498958	0.0498958	0.076097	0.0498852
bin.250.strict	95.75	1.342	0.598	Clostridiales	44191	2559237			0.0600937	0.0600758	0.0599547	0.0584049	0.0569356	0.0581096	0.0570997	0.0583945	0.0486372	0.0486372	0.0726634	0.0464979
bin.251.strict	88.39	0.256	0.6	Clostridiales	12258	2351671			0.0505612	0.0504071	0.0504479	0.0480658	0.0468856	0.0481199	0.0471186	0.0481173	0.047465	0.047465	0.066812	0.048536
bin.252.strict	79.75	1.371	0.495	Clostridiales	10941	2753962			0.0525752	0.0526729	0.0526324	0.0527562	0.0516919	0.0528948	0.0522194	0.0527574	0.0443985	0.0443985	0.0642118	0.0424392
bin.253.strict	87.4	2.298	0.491	Lachnospiraceae	22052	3302736			0.0636762	0.0636733	0.0636539	0.0631492	0.0614418	0.0631325	0.0621436	0.0631749	0.047015	0.047015	0.077164	0.045542
bin.254.orig	94.77	2.613	0.679	Actinobacteria	15670	2676803			0.0612372	0.061005	0.061069	0.0588619	0.0585045	0.0589055	0.058382	0.0588421	0.0615152	0.0615152	0.0905466	0.0661828
bin.255.permissive	92.49	2.202	0.423	Lachnospiraceae	22623	2839725			0.0471285	0.0471262	0.0470861	0.0462547	0.0452029	0.0462663	0.0456284	0.0462884	0.0405864	0.0405864	0.0688302	0.0414153
bin.256.strict	88.48	0.377	0.551	Bacteroidales	21247	2095454			0.0431929	0.0432998	0.0431392	0.043147	0.0427927	0.042969	0.0427078	0.0431658	0.0344608	0.0344608	0.0656499	0.0325649
bin.257.strict	84.58	1.712	0.341	Clostridiales	6267	2895694			0.0689005	0.0688992	0.0687299	0.0668514	0.0653826	0.0664821	0.0657167	0.0669156	0.053016	0.053016	0.0857646	0.0530739
bin.259.permissive	89.01	0.041	0.508	Proteobacteria	5399	1910808			0.0571648	0.0570047	0.0570149	0.0553072	0.0554628	0.0552368	0.0550066	0.0551895	0.0595953	0.0595953	0.0916491	0.0644728
bin.25.orig	96.87	1.436	0.454	Lachnospiraceae	58700	3869644			0.0609782	0.0610186	0.0608992	0.0602609	0.0586065	0.0600143	0.0590771	0.0602551	0.0489468	0.0489468	0.0761159	0.0441725
bin.260.strict	96.57	0.838	0.595	Clostridiales	32051	3006708			0.0677207	0.0676894	0.0675348	0.0656512	0.0638899	0.0651665	0.0640893	0.065644	0.0549526	0.0549526	0.0765102	0.0498843
bin.261.strict	86.17	6.17	0.558	Clostridiales	24094	3143864			0.0471933	0.047181	0.047164	0.0460338	0.0451061	0.046098	0.045528	0.046025	0.035633	0.035633	0.0671241	0.0401905
bin.263.orig	92.81	0.862	0.457	Lachnospiraceae	10125	2924843			0.0646974	0.0647513	0.0646789	0.0640825	0.0627684	0.0639622	0.0631985	0.0640336	0.0526485	0.0526485	0.081801	0.0500482
bin.264.strict	78.18	2.591	0.492	Lachnospiraceae	5414	2258479			0.0467238	0.046812	0.0466802	0.0463634	0.0455139	0.0462407	0.045753	0.046373	0.0371518	0.0371518	0.0637334	0.0357255
bin.265.orig	90.54	2.749	0.553	Lachnospiraceae	17114	3236308			0.0570123	0.0570382	0.0569935	0.0564276	0.0552478	0.0564428	0.0558085	0.0564588	0.0434544	0.0434544	0.0744142	0.0437176
bin.266.strict	86.69	1.898	0.454	Clostridiales	13288	3238278			0.0518918	0.0519786	0.0518852	0.0512724	0.0499725	0.0512469	0.0504878	0.0513104	0.0425268	0.0425268	0.0616991	0.0398457
bin.267.strict	95.37	1.845	0.569	Clostridiales	26745	3744399			0.0569849	0.0570391	0.0568383	0.0561468	0.0544141	0.0556146	0.0547219	0.0561472	0.0479733	0.0479733	0.0637361	0.0459463
bin.268.strict	90.92	0.632	0.483	Clostridiales	20858	3231720			0.052229	0.0523152	0.0522465	0.051908	0.0506808	0.0519241	0.0511318	0.0519189	0.0467856	0.0467856	0.0584848	0.0437286
bin.269.strict	59.69	1.724	0.631	Bacteria	10159	2078541			0.064814	0.0646814	0.0646932	0.0631414	0.0614188	0.0630896	0.061886	0.0631777	0.0463351	0.0463351	0.0816444	0.0454444
bin.26.strict	90.13	0.671	0.612	Clostridiales	12829	2292411			0.0556434	0.0554911	0.0555637	0.0536265	0.0525044	0.0537252	0.0528901	0.0536386	0.0422295	0.0422295	0.0792034	0.044937
bin.270.strict	74.18	0	0.444	Bacteria	4414	1157672			0.0865508	0.0865859	0.0863792	0.0835476	0.0830919	0.0829864	0.082813	0.0835389	0.0806098	0.0806098	0.114138	0.0753711
bin.271.orig	96.98	0.022	0.554	Bacteroidales	57652	2151327			0.0550283	0.0550169	0.0548942	0.0537243	0.0533486	0.0535748	0.0531848	0.0537581	0.0385117	0.0385117	0.0887239	0.0392493
bin.272.orig	95.86	1.836	0.476	Lachnospiraceae	24406	4068140			0.0731929	0.0731674	0.073099	0.0719997	0.070089	0.0718822	0.07075	0.0720732	0.0517509	0.0517509	0.0888007	0.0494944
bin.273.strict	88.08	0.357	0.631	Clostridiales	11686	2365345			0.0500414	0.0499081	0.0499518	0.048084	0.0468056	0.048149	0.0471609	0.0481569	0.0488327	0.0488327	0.0670458	0.0485192
bin.274.strict	92.88	1.32	0.568	Bacteroidales	18577	2281353			0.0421601	0.0421881	0.0420685	0.0410956	0.0410014	0.0410142	0.0408136	0.0411291	0.0355012	0.0355012	0.0702805	0.0350722
bin.275.strict	80.57	1.174	0.594	Clostridiales	10334	2480070			0.0608723	0.0607702	0.0607584	0.0599879	0.0583654	0.0599243	0.0587852	0.0600085	0.0423136	0.0423136	0.0776837	0.0429797
bin.276.orig	97.7	0.287	0.489	Lachnospiraceae	82237	2600596			0.0563903	0.0563235	0.0562817	0.0546842	0.053679	0.0546413	0.0539933	0.0547177	0.0435201	0.0435201	0.086348	0.0436393
bin.277.orig	96.65	2.208	0.475	Lachnospiraceae	25488	3807750			0.052807	0.0528944	0.0528216	0.052914	0.0516863	0.0529282	0.0522756	0.052961	0.0432357	0.0432357	0.0688937	0.0395243
bin.278.strict	86.68	2.181	0.588	Clostridiales	17862	2528032			0.0629247	0.0628904	0.0628351	0.0613532	0.0601764	0.061303	0.0604808	0.0613882	0.0523393	0.0523393	0.0748844	0.0535018
bin.279.permissive	91.81	2.689	0.475	Clostridiales	30913	3252379			0.0469111	0.0467705	0.0467412	0.0454156	0.0440519	0.0452402	0.0442457	0.0453908	0.0329679	0.0329679	0.0676514	0.0344708
bin.27.strict	96.87	1.426	0.387	Lactobacillales	21611	1866700			0.0461051	0.0460405	0.0459574	0.0462116	0.0453948	0.0459723	0.045205	0.0461711	0.0476128	0.0476128	0.0692657	0.0480425
bin.280.strict	84.57	0.335	0.599	Clostridiales	13589	1922094			0.0615345	0.061512	0.0614756	0.0599582	0.0588544	0.0600005	0.0592826	0.0600172	0.052636	0.052636	0.0765433	0.0530821
bin.281.strict	89.47	2.294	0.487	Clostridiales	17252	2852308			0.0537054	0.0538134	0.05372	0.0534648	0.0523733	0.0534425	0.0527942	0.0534861	0.0466264	0.0466264	0.0677209	0.0435391
bin.282.strict	80.51	1.403	0.63	Clostridiales	7608	2498971			0.0624416	0.0623337	0.0622867	0.0603069	0.0587135	0.0600946	0.0590674	0.0603066	0.0469307	0.0469307	0.0767499	0.048935
bin.283.orig	87	2.988	0.399	Lachnospiraceae	8699	3234661			0.0662037	0.0662258	0.066139	0.0646459	0.063324	0.0645797	0.0637773	0.0646685	0.0476662	0.0476662	0.0830097	0.0456916
bin.284.strict	81.97	0.377	0.488	Bacteroidales	10162	2298551			0.0459072	0.0459641	0.0458085	0.0448715	0.044677	0.0446441	0.0443953	0.0448599	0.0392027	0.0392027	0.0708563	0.0392819
bin.285.orig	91.95	2.873	0.4	Lachnospiraceae	67931	3523434			0.0679356	0.067978	0.0678995	0.067178	0.0656366	0.0670397	0.066192	0.0671584	0.0485604	0.0485604	0.0845628	0.0449196
bin.287.orig	90.68	1.132	0.509	Bacteroidales	23339	2327159			0.0458231	0.0459201	0.0457784	0.0453312	0.0451338	0.0452827	0.0450385	0.0453625	0.0375479	0.0375479	0.0691439	0.0363718
bin.288.strict	76.9	0	0.43	Bacteroidales	31405	2854963			0.0421518	0.042148	0.0420309	0.0417649	0.0402552	0.0415123	0.0405142	0.0417966	0.0253453	0.0253453	0.0583547	0.0244863
bin.289.orig	94.43	3.184	0.502	Lachnospiraceae	26320	4431287			0.063985	0.0639993	0.0639045	0.0629215	0.0611597	0.0627103	0.0617432	0.0629421	0.0479589	0.0479589	0.08098	0.0455722
bin.28.strict	92.51	0.111	0.537	Clostridiales	23585	1555604			0.0616031	0.0613814	0.0614292	0.0607202	0.0596181	0.060714	0.0598989	0.0607643	0.0503999	0.0503999	0.0910416	0.0520335
bin.290.orig	53.73	0	0.466	Bacteria	1969	889381			0.0940922	0.0941838	0.0939144	0.0910993	0.0907117	0.0904847	0.0904095	0.0910623	0.0797873	0.0797873	0.120967	0.0780735
bin.291.orig	52.57	1.724	0.61	Bacteria	4137	1000417			0.0667646	0.0666677	0.0666161	0.0650843	0.0642338	0.064964	0.0642612	0.0650277	0.0491081	0.0491081	0.092608	0.0491897
bin.292.orig	83.92	0.993	0.485	Clostridia	3365	1604580			0.0627677	0.0629005	0.0627266	0.0638539	0.0637492	0.0637035	0.0637493	0.0639078	0.0703033	0.0703033	0.075051	0.0723616
bin.293.orig	98.22	0	0.432	Deltaproteobacteria	228453	2137483			0.0561218	0.0559913	0.0559898	0.0529442	0.0527995	0.0529104	0.0526329	0.0529105	0.0505	0.0505	0.0882904	0.0555364
bin.294.strict	95.06	1.577	0.574	Deltaproteobacteria	25415	3020430			0.0550919	0.0549582	0.0549247	0.0512526	0.0504418	0.0511212	0.0503814	0.0512656	0.0462863	0.0462863	0.0787967	0.047867
bin.295.orig	54.38	4.106	0.48	Bacteria	4545	1713904			0.128022	0.128052	0.127638	0.126601	0.124173	0.125453	0.123855	0.126541	0.108471	0.108471	0.145927	0.0969887
bin.296.permissive	85.77	2.222	0.508	Lachnospiraceae	21970	3916063			0.0659842	0.0659745	0.0660057	0.0657086	0.0638492	0.0658389	0.0647329	0.0657701	0.0592758	0.0592758	0.0741822	0.0578249
bin.297.orig	97.44	5.958	0.51	Lachnospiraceae	57095	4611965			0.0637303	0.063749	0.0636796	0.0633371	0.0615865	0.0632475	0.0623587	0.0634185	0.0443737	0.0443737	0.0807456	0.0446581
bin.298.strict	96.64	0	0.523	Clostridiales	44875	2242211			0.0597968	0.0597671	0.0596799	0.0588415	0.057535	0.0586803	0.057897	0.0589325	0.0465645	0.0465645	0.0767362	0.0467702
bin.299.strict	89.92	2.822	0.655	Actinobacteria	13802	2529655			0.0684701	0.0681991	0.0683081	0.0661053	0.0656898	0.066237	0.0655626	0.066071	0.0699652	0.0699652	0.0970841	0.0772269
bin.29.orig	84.59	0.628	0.539	Bacteroidales	13857	2007726			0.0518281	0.0518337	0.051716	0.0506212	0.0504424	0.0505107	0.0502484	0.0506735	0.0366684	0.0366684	0.0826842	0.0385429
bin.2.strict	91.14	1.16	0.508	Clostridiales	21188	3293521			0.0470098	0.0470864	0.0470572	0.0464291	0.045517	0.0465834	0.0460605	0.0464852	0.0445829	0.0445829	0.0579347	0.0439947
bin.300.strict	90.39	2.483	0.605	Clostridiales	17202	3430510			0.07355	0.0734898	0.0732704	0.0714471	0.0692516	0.0707112	0.069242	0.0713934	0.0634338	0.0634338	0.0854089	0.0574456
bin.301.strict	74.12	0.391	0.652	Clostridiales	6628	1823414			0.0518039	0.0517299	0.0517464	0.0503648	0.0496775	0.0504677	0.0500035	0.0503816	0.044418	0.044418	0.0711771	0.0489937
bin.302.orig	98.11	1.347	0.508	Bacteria	30700	2342380			0.0447248	0.0448156	0.0446372	0.0452944	0.0445635	0.0450855	0.0446855	0.0453175	0.0391612	0.0391612	0.0599948	0.0381444
bin.303.strict	71.78	2.818	0.596	Clostridiales	5790	2474199			0.0621085	0.0621169	0.0619967	0.0599827	0.0586505	0.0597076	0.058969	0.0599902	0.0529774	0.0529774	0.0700044	0.051435
bin.304.strict	92.97	1.006	0.586	Clostridiales	35071	2458348			0.0596523	0.0595048	0.0595431	0.0578773	0.0563692	0.0579194	0.0568052	0.0579141	0.043036	0.043036	0.0764827	0.0440305
bin.305.strict	84.8	2.818	0.591	Clostridiales	7798	2505141			0.0603155	0.0602814	0.0601921	0.0587583	0.0574007	0.058535	0.0577047	0.0587589	0.0474305	0.0474305	0.0785028	0.0485217
bin.306.orig	98.65	0.671	0.488	Clostridiales	51101	2403251			0.0597422	0.0595466	0.0595708	0.057711	0.0563106	0.0576073	0.0566541	0.0577471	0.0424368	0.0424368	0.0839017	0.0455169
bin.307.orig	74.9	0	0.501	Bacteroidales	110832	1575739			0.077422	0.0774318	0.0772492	0.0760394	0.0757968	0.0758014	0.0754314	0.0760782	0.0565829	0.0565829	0.109159	0.0554713
bin.308.strict	99.42	2.394	0.475	Lachnospiraceae	115425	3844761			0.0610823	0.0611275	0.0610238	0.0604449	0.0587654	0.0602536	0.0593737	0.0604825	0.0465758	0.0465758	0.0720689	0.0430105
bin.309.strict	94.86	2.413	0.504	Lachnospiraceae	29379	3764048			0.0653492	0.0654462	0.0653737	0.0654661	0.0639779	0.0654693	0.0647411	0.065517	0.0514612	0.0514612	0.0756478	0.0475931
bin.30.orig	94.16	2.09	0.496	Clostridiales	7434	2358570			0.0629427	0.0627848	0.0627556	0.0601523	0.0586421	0.0599581	0.0587856	0.0601653	0.0573053	0.0573053	0.0824767	0.0581489
bin.310.orig	99.46	0	0.431	Bacteria	136344	3607331			0.0627025	0.0625341	0.0625568	0.061882	0.0609572	0.0618745	0.0609995	0.0618976	0.0438544	0.0438544	0.0860318	0.0495924
bin.311.strict	90.4	0.917	0.584	Clostridiales	12714	1990713			0.0578257	0.0578016	0.0577277	0.0563802	0.0553122	0.056189	0.0556091	0.0563904	0.0495023	0.0495023	0.0781315	0.0504578
bin.312.strict	56.6	5.172	0.631	Bacteria	8410	2051978			0.0498138	0.0496964	0.0497197	0.0478394	0.0467296	0.047879	0.0470278	0.0478589	0.0377403	0.0377403	0.0713292	0.0399467
bin.313.orig	98.73	1.265	0.45	Clostridiales	80661	3655350			0.0414849	0.0415196	0.0414384	0.0408421	0.0398452	0.0407988	0.0401923	0.0408904	0.0343933	0.0343933	0.0587252	0.0334313
bin.314.orig	90.73	0.51	0.394	Clostridia	51507	3114086			0.0682382	0.0679302	0.0680088	0.0659456	0.0641708	0.0659264	0.0644764	0.0660019	0.0555193	0.0555193	0.0896105	0.0590109
bin.316.strict	86.4	1.265	0.573	Clostridiales	25064	2825703			0.0529374	0.0529101	0.052899	0.0522244	0.0510489	0.0522264	0.0515359	0.05223	0.0409617	0.0409617	0.0682974	0.0433563
bin.317.orig	95.84	0.862	0.507	Lachnospiraceae	16226	2969418			0.0575613	0.0575296	0.0574868	0.0559616	0.0547777	0.0559621	0.0552712	0.0560043	0.0432364	0.0432364	0.0836297	0.0456139
bin.318.orig	97.73	1.32	0.482	Bacteroidales	69812	2746028			0.0403006	0.0404174	0.0402751	0.0402931	0.0398382	0.040181	0.0398986	0.0403106	0.0314152	0.0314152	0.0570134	0.0288236
bin.31.orig	99.24	2.475	0.529	Bacteroidales	47874	2849159			0.0405931	0.0406908	0.0405996	0.0411532	0.0410611	0.0411957	0.0410625	0.041159	0.0263031	0.0263031	0.0607102	0.0286428
bin.320.strict	91.81	3.579	0.555	Clostridiales	16953	2551881			0.0576748	0.057602	0.0575864	0.0569908	0.0554247	0.0568502	0.0559081	0.0570293	0.0462019	0.0462019	0.0731563	0.0478884
bin.321.strict	61.13	0.125	0.524	Bacteroidales	55226	1604962			0.0620141	0.0619145	0.0618475	0.0595837	0.0589518	0.0595429	0.0587454	0.0596417	0.0455784	0.0455784	0.0892255	0.0467717
bin.322.strict	98.55	0.48	0.638	Bacteroidetes	60507	1771231			0.0627051	0.0625935	0.0625467	0.0609098	0.0603342	0.0607273	0.0599864	0.0608608	0.0475135	0.0475135	0.0971553	0.0472673
bin.323.orig	97.56	0.788	0.505	Bacteroidales	24608	2645061			0.0392795	0.0393638	0.0392449	0.0392897	0.0390377	0.0392431	0.0390263	0.0392753	0.0286286	0.0286286	0.0593463	0.0283134
bin.324.strict	98.78	0.402	0.578	Clostridiales	91467	2576076			0.0580342	0.057962	0.0578878	0.0559204	0.0544777	0.0557305	0.0548104	0.0559666	0.0463816	0.0463816	0.0715126	0.0462263
bin.326.strict	75.27	2.536	0.528	Lachnospiraceae	6383	2616043			0.0693855	0.069483	0.0694046	0.0686714	0.067387	0.068654	0.0680591	0.0687048	0.0518274	0.0518274	0.0822117	0.049289
bin.327.strict	75.86	2.258	0.304	Clostridiales	15210	1370989			0.106969	0.107019	0.106698	0.105069	0.103911	0.104305	0.103592	0.105103	0.0997322	0.0997322	0.129654	0.0909689
bin.328.permissive	93.27	2.492	0.487	Clostridia	27290	2648549			0.0440092	0.0440438	0.0439637	0.0426483	0.0420943	0.0424983	0.0421638	0.0426091	0.0482866	0.0482866	0.0633289	0.0505406
bin.329.strict	58.63	2.914	0.449	Lachnospiraceae	2631	1894810			0.0633834	0.0635379	0.0634062	0.0633529	0.0624162	0.0632641	0.0628703	0.0633313	0.0512463	0.0512463	0.079183	0.0475872
bin.32.strict	63.29	1.342	0.572	Clostridiales	8335	1530258			0.0675791	0.0675143	0.0675469	0.0663076	0.06523	0.0664939	0.0657476	0.0663755	0.0517995	0.0517995	0.087267	0.0547395
bin.332.permissive	55.51	0	0.603	Bacteria	4796	2699528			0.05926	0.0593168	0.0590885	0.0579766	0.0561045	0.0574164	0.0563893	0.0580128	0.0511463	0.0511463	0.0706596	0.0460712
bin.333.strict	51.49	1.256	0.541	Lachnospiraceae	2893	2393939			0.0549053	0.0550667	0.0549711	0.0551813	0.0542966	0.0552317	0.0550118	0.0552198	0.0513945	0.0513945	0.0664206	0.0498877
bin.334.permissive	53.56	0	0.447	Clostridiales	2464	1526938			0.0620642	0.0622827	0.0620039	0.0618878	0.0612746	0.0614111	0.0611719	0.0618464	0.0627891	0.0627891	0.0703198	0.0565237
bin.335.orig	51.89	8.965	0.599	Bacteria	2527	3083731			0.0663974	0.0664101	0.0662503	0.0648368	0.0630818	0.0644456	0.0633543	0.0648494	0.0519346	0.0519346	0.0747229	0.0474288
bin.336.permissive	58.05	6.034	0.584	Bacteria	4276	2744316			0.0576421	0.0575733	0.0575026	0.0560821	0.0544081	0.0558002	0.0547131	0.0560978	0.0458319	0.0458319	0.0708522	0.0453789
bin.337.orig	53.65	0.129	0.351	Bacteria	2276	1229537			0.0663038	0.0663544	0.0662093	0.0664481	0.0652073	0.0661374	0.0654289	0.0664549	0.0627772	0.0627772	0.069613	0.060172
bin.338.permissive	64.53	1.612	0.558	Clostridia	2184	1369977			0.049267	0.049322	0.0492602	0.0484937	0.0480406	0.048523	0.0482265	0.0485119	0.048191	0.048191	0.0645636	0.0498309
bin.339.orig	59	1.476	0.45	Clostridiales	3474	2302787			0.0460437	0.046112	0.0460223	0.0460635	0.0448733	0.0460382	0.0453478	0.0460956	0.0389159	0.0389159	0.0577202	0.037547
bin.33.strict	98.81	0	0.611	Deltaproteobacteria	93670	2436275			0.0556468	0.0555074	0.0554969	0.0526079	0.0519672	0.0525006	0.0518819	0.0525795	0.0453852	0.0453852	0.0902548	0.0477487
bin.340.orig	65.9	6.501	0.463	Clostridiales	1940	1915072			0.0675468	0.0673112	0.0674053	0.0656617	0.0649858	0.0656898	0.0650123	0.0655985	0.0540368	0.0540368	0.0978412	0.0623966
bin.341.strict	62.03	7.389	0.476	Clostridiales	2387	1274741			0.073164	0.0733268	0.0730989	0.0727117	0.0724809	0.0724509	0.0724451	0.0727415	0.0773395	0.0773395	0.0913628	0.0769082
bin.342.strict	64.38	3.02	0.583	Clostridiales	4494	2240834			0.0628901	0.0628445	0.062778	0.0625454	0.0607569	0.0623276	0.0612943	0.0626314	0.051743	0.051743	0.0759582	0.0492552
bin.35.orig	88.9	5.809	0.462	Lachnospiraceae	13530	2871664			0.058741	0.0586253	0.0586457	0.0569171	0.0555774	0.056884	0.0560901	0.0569334	0.0460204	0.0460204	0.0841699	0.0476098
bin.36.permissive	75.9	0	0.482	Clostridiales	5856	1676573			0.0505809	0.0505767	0.0504989	0.0502404	0.0497772	0.0502253	0.0498362	0.0502691	0.0488353	0.0488353	0.0655671	0.0490222
bin.37.orig	62.53	1.754	0.494	Lachnospiraceae	2887	1767209			0.049265	0.0492305	0.0492225	0.0475928	0.0466233	0.0476302	0.0470251	0.0475706	0.0444139	0.0444139	0.0728255	0.0462165
bin.38.strict	79.67	0.273	0.451	Lachnospiraceae	11078	2636599			0.048298	0.0484626	0.0483002	0.047689	0.0467484	0.0475238	0.0471488	0.0477136	0.0380326	0.0380326	0.0598443	0.0363157
bin.39.strict	95.3	0.671	0.575	Clostridiales	356097	2367715			0.0628965	0.0628798	0.0628125	0.0628043	0.061321	0.0626852	0.0617138	0.0628518	0.0513291	0.0513291	0.0749363	0.0470712
bin.3.orig	78.14	2.174	0.527	Lachnospiraceae	9734	3254104			0.0606166	0.0607561	0.0606572	0.0606475	0.0592209	0.0606016	0.05996	0.060699	0.0504826	0.0504826	0.0704431	0.0482919
bin.40.strict	76.56	2.534	0.488	Lachnospiraceae	9107	2783848			0.056528	0.0563768	0.0564536	0.0548508	0.0532172	0.054979	0.0538363	0.0548818	0.0464231	0.0464231	0.0789967	0.0490004
bin.41.orig	97.61	1.132	0.513	Bacteroidales	24947	2511600			0.0572054	0.0571636	0.0570128	0.0560902	0.0554643	0.0558109	0.0551968	0.0561057	0.0428223	0.0428223	0.0873037	0.0438162
bin.42.strict	92.79	2.52	0.485	Lachnospiraceae	42405	3335035			0.0524592	0.0523776	0.0524295	0.0516045	0.0502942	0.0517251	0.0507549	0.0515853	0.0467033	0.0467033	0.0687274	0.0472774
bin.43.strict	89.64	2.641	0.53	Bacteroidales	13821	2183049			0.0468508	0.0470141	0.0468456	0.0476756	0.0476923	0.0475829	0.0476279	0.0476702	0.036458	0.036458	0.0670054	0.0353835
bin.44.orig	81.36	1.118	0.295	Clostridiales	137611	1528064			0.103221	0.103171	0.102964	0.102123	0.100711	0.101633	0.100546	0.102184	0.092079	0.092079	0.128672	0.084319
bin.45.orig	98.87	1.075	0.469	Bacteria	32736	2795736			0.0395979	0.0396515	0.0395167	0.0396243	0.0389409	0.0394589	0.0389218	0.0396796	0.0299889	0.0299889	0.0589783	0.030267
bin.46.strict	99.19	0	0.588	Actinobacteria	1244898	2058311			0.0453201	0.0453383	0.0452628	0.0459902	0.0454618	0.0459125	0.0455369	0.0459366	0.0458205	0.0458205	0.0702665	0.047764
bin.47.strict	71.63	1.245	0.484	Lachnospiraceae	4320	2356808			0.0634686	0.0635105	0.0634406	0.0628538	0.0616046	0.06283	0.0621645	0.062891	0.0515078	0.0515078	0.0857173	0.049689
bin.48.strict	60.06	1.724	0.6	Bacteria	17507	2373177			0.0581439	0.0581018	0.0580527	0.0564954	0.0550136	0.0563888	0.0554791	0.0565278	0.0430807	0.0430807	0.0695153	0.0445266
bin.49.orig	98.73	0.336	0.494	Clostridiales	37061	3103954			0.0455039	0.0454081	0.0453681	0.0440581	0.0429701	0.043991	0.0431523	0.0440902	0.0306725	0.0306725	0.0678614	0.0328558
bin.4.strict	93.33	0	0.519	Clostridiales	22799	1583898			0.0693848	0.0694666	0.069345	0.0697793	0.0696285	0.0696959	0.0696684	0.0698358	0.0711897	0.0711897	0.0872086	0.0720374
bin.50.permissive	99.82	0.706	0.366	Campylobacterales	117408	1788591			0.0695156	0.0693728	0.0693439	0.065964	0.06614	0.0658026	0.0657595	0.0658881	0.0632839	0.0632839	0.112088	0.0691828
bin.51.permissive	97.48	1.442	0.578	Bacteroidetes	123931	2454588			0.0482868	0.0482985	0.048221	0.0480861	0.0474504	0.048009	0.0474312	0.048075	0.0298356	0.0298356	0.0707308	0.0315438
bin.52.strict	97.44	5.217	0.542	Lachnospiraceae	38933	4425410			0.0533414	0.0534178	0.0533666	0.052769	0.0515251	0.0528039	0.052169	0.0527966	0.050783	0.050783	0.0621388	0.0481901
bin.53.strict	97.25	0.444	0.637	Bifidobacteriaceae	79492	1877009			0.0570235	0.0570792	0.056987	0.0585083	0.0579726	0.0583443	0.0579697	0.0584026	0.0575993	0.0575993	0.0788213	0.0585776
bin.54.orig	67.83	0.514	0.502	Bacteria	2231	1295627			0.0644964	0.0644772	0.0643779	0.062632	0.0626257	0.0623915	0.0622169	0.0625091	0.04908	0.04908	0.0924857	0.0513839
bin.55.strict	97.86	1.342	0.56	Clostridiales	69152	3037297			0.0540974	0.054113	0.0539609	0.0521976	0.051023	0.0518813	0.0511982	0.0522076	0.0483721	0.0483721	0.0694943	0.0474222
bin.56.orig	61.03	1.724	0.618	Bacteria	3937	1750084			0.0614317	0.0613886	0.0613434	0.0597349	0.0585556	0.0597167	0.0589727	0.0598015	0.0464486	0.0464486	0.0772947	0.0484129
bin.57.strict	97.76	1.139	0.432	Clostridiales	20695	2157690			0.0607251	0.0606997	0.0606701	0.0613856	0.0609037	0.0614259	0.061092	0.0613993	0.052064	0.052064	0.081259	0.0542001
bin.58.strict	88.59	0.671	0.471	Clostridiales	98148	2806663			0.0556837	0.0556757	0.0556132	0.0554701	0.0543488	0.0554009	0.0546695	0.055522	0.0453363	0.0453363	0.0716231	0.0438286
bin.59.strict	98.23	0.978	0.531	Clostridiales	21733	3629914			0.0503433	0.0502789	0.0502362	0.0491746	0.0477889	0.0491153	0.0480828	0.049194	0.0334378	0.0334378	0.0741665	0.0332307
bin.5.orig	99.35	0.754	0.49	Bacteroidales	55944	2541919			0.044308	0.0443953	0.0442851	0.0445545	0.0443271	0.0444864	0.0442777	0.0445513	0.0336794	0.0336794	0.0654044	0.0341068
bin.60.strict	81.66	0.765	0.446	Clostridia	18056	1448037			0.0755451	0.0753421	0.0753294	0.0742851	0.0733275	0.0741222	0.0732784	0.0742764	0.0653168	0.0653168	0.105421	0.0678857
bin.61.strict	96.59	1.915	0.46	Lachnospiraceae	30808	3265724			0.055137	0.0551349	0.0550892	0.0537789	0.0523845	0.0536996	0.0528401	0.0537986	0.0453221	0.0453221	0.0715919	0.0442729
bin.62.orig	63.07	0	0.458	Bacteroidales	74901	1435282			0.0703189	0.0703117	0.0701914	0.0691103	0.06843	0.0689264	0.0682251	0.0691003	0.0507151	0.0507151	0.097994	0.0511334
bin.63.strict	89.7	5.811	0.464	Lachnospiraceae	10339	3506283			0.0611402	0.0612339	0.0611569	0.060807	0.059251	0.0607815	0.0600081	0.0608469	0.0488559	0.0488559	0.0713287	0.0468123
bin.64.strict	97.52	0.241	0.507	Lachnospiraceae	48067	2688015			0.0609141	0.0608616	0.0607902	0.0591831	0.05819	0.0590843	0.0584499	0.0592201	0.0445395	0.0445395	0.0906691	0.0449678
bin.65.strict	82.61	1.57	0.468	Lachnospiraceae	20158	2713544			0.062242	0.0621415	0.0621212	0.0603256	0.0586581	0.0602111	0.0591262	0.0603386	0.0487287	0.0487287	0.08552	0.0475881
bin.66.strict	87.63	4.516	0.503	Lachnospiraceae	10500	3937219			0.0639562	0.0640361	0.0639696	0.0642658	0.0626602	0.0642254	0.0634206	0.0643089	0.0523572	0.0523572	0.0759659	0.049869
bin.67.orig	76.16	3.404	0.486	Lachnospiraceae	3357	2946527			0.0573082	0.057397	0.0573355	0.0572566	0.0560808	0.0572574	0.0567095	0.057251	0.0489564	0.0489564	0.0736193	0.0476102
bin.68.strict	65.86	1.724	0.604	Bacteria	13378	2572390			0.0582888	0.0581798	0.058174	0.0573894	0.0557405	0.0572759	0.0561884	0.0574215	0.0365494	0.0365494	0.0765928	0.0388104
bin.69.orig	89.74	1.265	0.505	Clostridiales	10603	3217732			0.0500755	0.0500163	0.0499768	0.0489058	0.0479155	0.0489172	0.0481788	0.0489275	0.0373716	0.0373716	0.0741245	0.0413642
bin.70.strict	88.16	5.087	0.543	Clostridiales	13374	2748928			0.0438864	0.0438871	0.0438287	0.0423408	0.0415714	0.0423102	0.0418453	0.0423193	0.0415496	0.0415496	0.0623182	0.0430599
bin.71.strict	93.02	0	0.495	Clostridiales	39064	2451547			0.0725709	0.0723588	0.0724194	0.069625	0.069045	0.0697212	0.0691615	0.0696105	0.056963	0.056963	0.100668	0.0655442
bin.72.strict	93.95	0.806	0.691	Actinobacteria	58307	2048907			0.0420505	0.0421074	0.0420035	0.0422468	0.0420103	0.0421314	0.0419274	0.042186	0.0442786	0.0442786	0.0623355	0.0447509
bin.73.strict	91.74	7.337	0.613	Clostridiales	26630	2764041			0.0691502	0.069189	0.068985	0.0676612	0.0658088	0.0671303	0.066117	0.0676768	0.0584309	0.0584309	0.0760362	0.0534988
bin.74.strict	83.05	2.203	0.489	Lachnospiraceae	10486	2582949			0.0631375	0.0631299	0.0630845	0.0619761	0.0604702	0.0619073	0.0609986	0.061995	0.0492988	0.0492988	0.0817485	0.0488318
bin.75.permissive	62.76	0.022	0.504	Bacteroidales	70285	1671504			0.0628145	0.0628205	0.0625747	0.0602531	0.0587902	0.0595919	0.0585377	0.0602302	0.0436046	0.0436046	0.081924	0.0389258
bin.76.orig	96.04	4.641	0.483	Clostridiales	21033	3502926			0.0436313	0.043673	0.0435861	0.0426229	0.0414951	0.0424896	0.0419068	0.042641	0.03976	0.03976	0.0565573	0.0374092
bin.77.permissive	94.63	0	0.547	Clostridiales	76531	1860551			0.082651	0.0823708	0.082427	0.0797874	0.0779904	0.07967	0.0782742	0.0798493	0.0658579	0.0658579	0.106696	0.0679607
bin.78.strict	86.4	0	0.565	Clostridiales	18734	1906555			0.0583571	0.0582593	0.0582804	0.0563545	0.0553585	0.0564457	0.0557253	0.0563963	0.0472396	0.0472396	0.0766413	0.0483709
bin.79.orig	98.55	0.015	0.403	Lachnospiraceae	60581	2921072			0.0730174	0.07298	0.072859	0.071065	0.0698743	0.0708543	0.0700155	0.0710772	0.0574057	0.0574057	0.0984572	0.0558889
bin.7.strict	93.49	1.118	0.569	Clostridiales	22796	2701084			0.057188	0.0570674	0.057044	0.0549126	0.0532499	0.0547486	0.0536229	0.0549385	0.0401515	0.0401515	0.0745487	0.0393801
bin.80.orig	97.95	0	0.554	Bacteria	99928	2847134			0.038362	0.0384429	0.0382766	0.0376969	0.0375827	0.0374948	0.0374632	0.037674	0.0323824	0.0323824	0.067625	0.0303613
bin.81.strict	68.4	2.097	0.603	Clostridiales	4333	2536438			0.0621942	0.0622415	0.0620938	0.0608167	0.0592505	0.0604288	0.059586	0.0608107	0.0557145	0.0557145	0.0710434	0.0529435
bin.82.strict	84.91	0	0.616	Clostridiales	17474	2351711			0.0525419	0.0524926	0.0524424	0.0509806	0.0496975	0.050877	0.0500387	0.051007	0.0418767	0.0418767	0.0689776	0.0428337
bin.83.strict	76.27	1.067	0.523	Clostridiales	6422	1816469			0.0467482	0.0466807	0.0466851	0.0451	0.0442056	0.0451791	0.0444416	0.0451339	0.0373733	0.0373733	0.0695231	0.03936
bin.84.permissive	53.09	1.98	0.477	Bacteria	12215	611175			0.17055	0.17073	0.170287	0.169533	0.168831	0.168625	0.168463	0.169547	0.170462	0.170462	0.19845	0.161138
bin.85.strict	87.41	1.231	0.49	Lachnospiraceae	10861	3046004			0.067194	0.0672112	0.0671169	0.0667822	0.0651002	0.0666666	0.0657068	0.0668222	0.047577	0.047577	0.0802185	0.0448719
bin.86.strict	96.03	0.377	0.532	Bacteroidales	88413	2159796			0.0584644	0.0584863	0.0583001	0.0573856	0.0565018	0.0570019	0.056281	0.0574129	0.0454832	0.0454832	0.0832694	0.0422938
bin.87.permissive	94.89	0	0.484	Clostridiales	45363	3497300			0.0427001	0.0427306	0.0426332	0.0422566	0.0412257	0.0421622	0.0414767	0.042295	0.0362827	0.0362827	0.0573067	0.0365018
bin.88.orig	95.85	0.295	0.645	Deltaproteobacteria	112244	2605204			0.0510546	0.0509329	0.0509054	0.0479471	0.0471977	0.047794	0.0471475	0.0479304	0.0403683	0.0403683	0.082527	0.0437295
bin.89.strict	89.63	2.46	0.625	Clostridiales	14094	2292869			0.0576617	0.0575853	0.0575635	0.0561626	0.0546893	0.056047	0.054996	0.0561578	0.0426408	0.0426408	0.0738999	0.0408904
bin.8.strict	89.24	1.323	0.42	Clostridiales	14102	2304833			0.05848	0.0583636	0.058376	0.0567879	0.0553445	0.056799	0.0558127	0.0568014	0.044114	0.044114	0.0780369	0.045758
bin.90.strict	96.01	0.181	0.516	Lachnospiraceae	63431	3203975			0.0589698	0.0589926	0.0589386	0.0578718	0.0566128	0.0578676	0.057205	0.0579084	0.048353	0.048353	0.0780224	0.0467218
bin.91.permissive	95.42	0.806	0.625	Actinobacteria	19017	2210809			0.0640516	0.0638275	0.0638929	0.0620388	0.0620339	0.0620762	0.0616827	0.0619676	0.0705397	0.0705397	0.0951106	0.0751301
bin.92.strict	96.29	1.342	0.551	Bacteroidales	21623	2293622			0.0534763	0.0534741	0.0533608	0.052465	0.0519572	0.0523392	0.0518326	0.052457	0.0366349	0.0366349	0.0783658	0.037816
bin.94.strict	69.07	3.78	0.413	Bacteroidales	28915	3535655			0.0467602	0.0467884	0.0466393	0.0471414	0.0455948	0.0468197	0.0458226	0.0471596	0.0296618	0.0296618	0.059413	0.0273445
bin.95.permissive	89.41	3.164	0.54	Clostridiales	20415	3135093			0.0606526	0.0606968	0.0606325	0.0598659	0.058525	0.059837	0.0590333	0.0598926	0.0509779	0.0509779	0.0684916	0.0489829
bin.96.orig	96.09	2.107	0.522	Lachnospiraceae	11901	3716120			0.0573085	0.0573632	0.0572538	0.0567937	0.0554897	0.0566079	0.0560098	0.0568184	0.0452685	0.0452685	0.0737804	0.0430638
bin.97.permissive	89.98	0.961	0.603	Bacteroidetes	108529	1938850			0.0447638	0.0447756	0.0446865	0.0437588	0.0435641	0.0436518	0.0433184	0.0437493	0.0369174	0.0369174	0.0747641	0.0378166
bin.98.strict	83.5	2.237	0.608	Clostridiales	15205	2164689			0.0601699	0.0601057	0.060089	0.0588164	0.0573212	0.0587697	0.0578027	0.0588727	0.0462096	0.0462096	0.0729539	0.0459831
bin.9.permissive	59.85	0	0.615	Bacteria	8706	1971529			0.0664795	0.066387	0.0663585	0.0650827	0.0634094	0.0649567	0.0638781	0.0651334	0.0498306	0.0498306	0.0830945	0.0511278
