# Supplementary material for: Metagenomic Insights into the Anti-Obesity Effect of a Polysaccharide from Saccharina japonica
Source: Foods. 2023 Feb 3;12(3):665. doi: 10.3390/foods12030665 (PMC9914707; doi:10.3390/foods12030665)
Supplement: Supplementary file 1 [file foods-12-00665-s001.zip › Table S3.xlsx]

## Sheet: Sheet1
MAG	Number of Protein-coding Genes	Annotated as Carbohydrate-active Enzymes	%
bin.80.orig	2475	176	7.11111
bin.124.permissive	3084	138	4.47471
bin.22.orig	4036	389	9.63826
bin.53.strict	1586	124	7.81841
bin.206.orig	2239	190	8.48593
bin.33.strict	2238	95	4.24486
bin.158.strict	1936	104	5.3719
bin.109.strict	3070	160	5.21173
bin.328.permissive	2771	66	2.38181
bin.217.strict	2558	153	5.98124
bin.1.orig	2683	125	4.65896
bin.101.permissive	3137	158	5.03666
bin.118.strict	2346	194	8.26939
bin.122.strict	2806	249	8.87384
bin.130.strict	3863	232	6.0057
bin.137.strict	3782	174	4.60074
bin.147.strict	3472	200	5.76037
bin.150.permissive	3287	126	3.83328
bin.191.strict	3286	201	6.11686
bin.223.orig	4198	530	12.6251
bin.225.orig	3192	292	9.14787
bin.245.permissive	3409	174	5.10414
bin.286.strict	3921	139	3.54501
bin.315.orig	2643	125	4.72947
bin.325.strict	4375	171	3.90857
bin.330.strict	3485	143	4.1033
bin.331.permissive	2141	106	4.95096
bin.34.strict	3238	173	5.3428
bin.93.orig	3391	142	4.18756
bin.99.permissive	2720	132	4.85294
